# Supplementary material
Source: PubMed Central journal article supplement (PMC6344062)

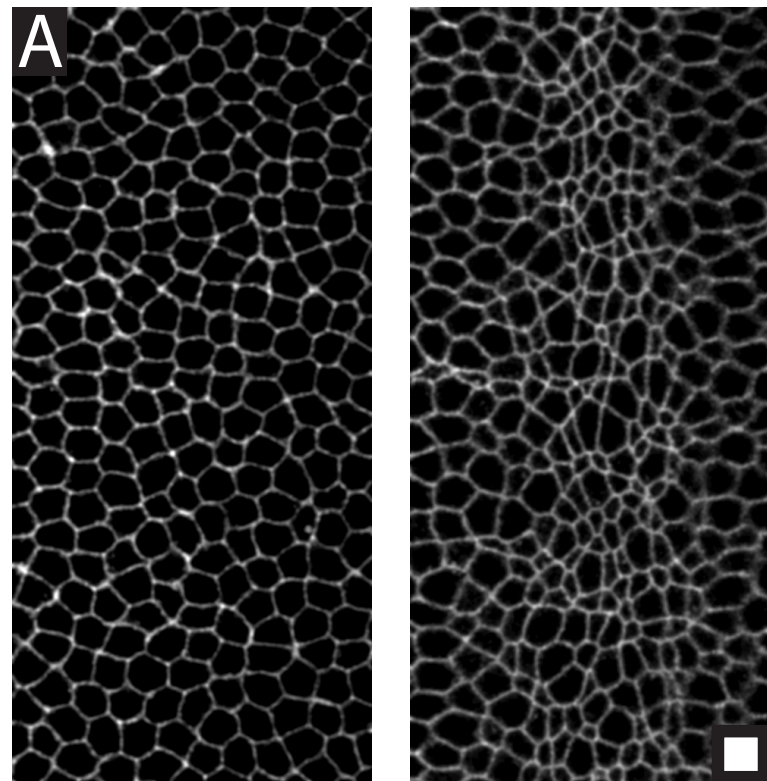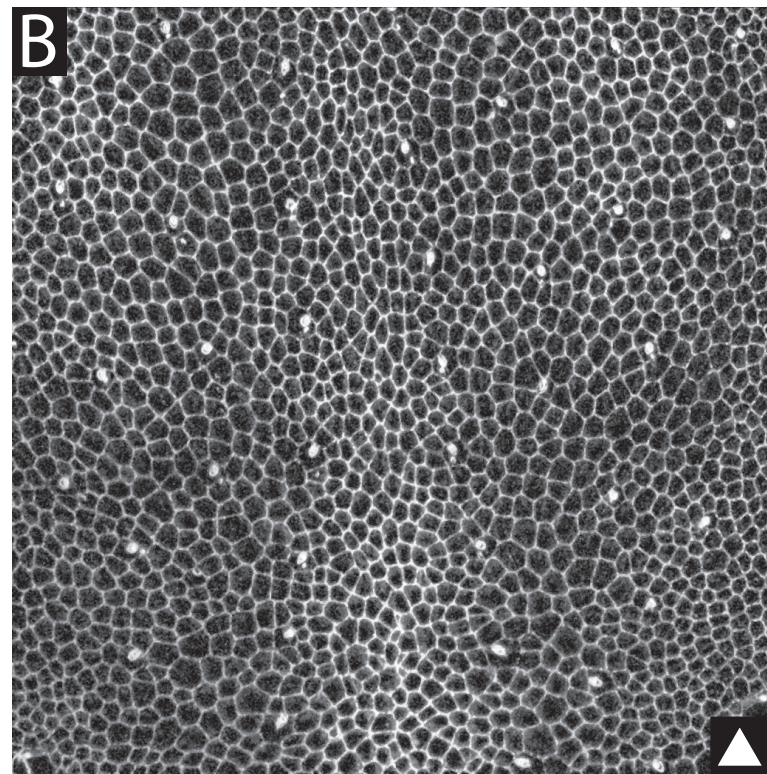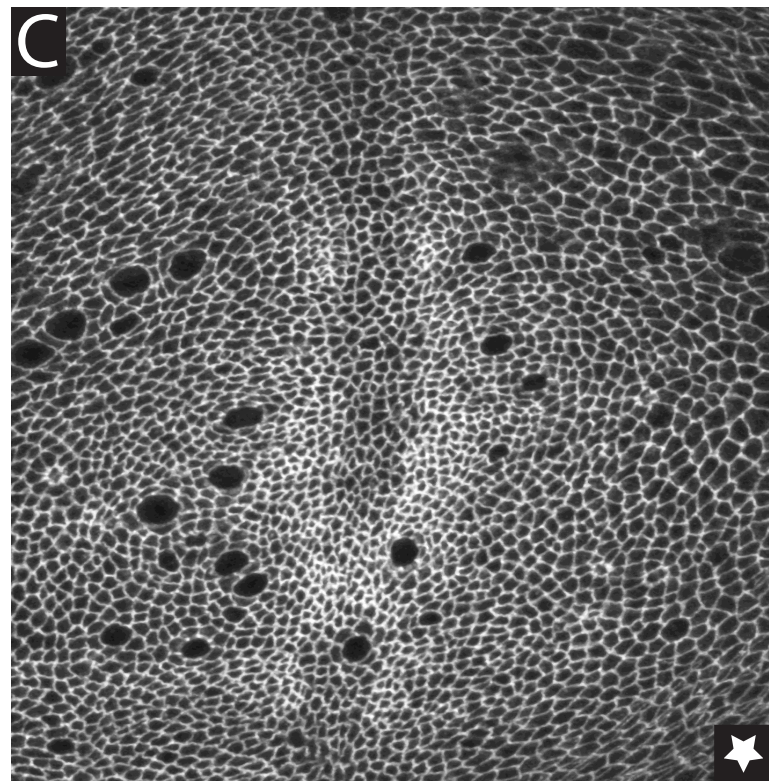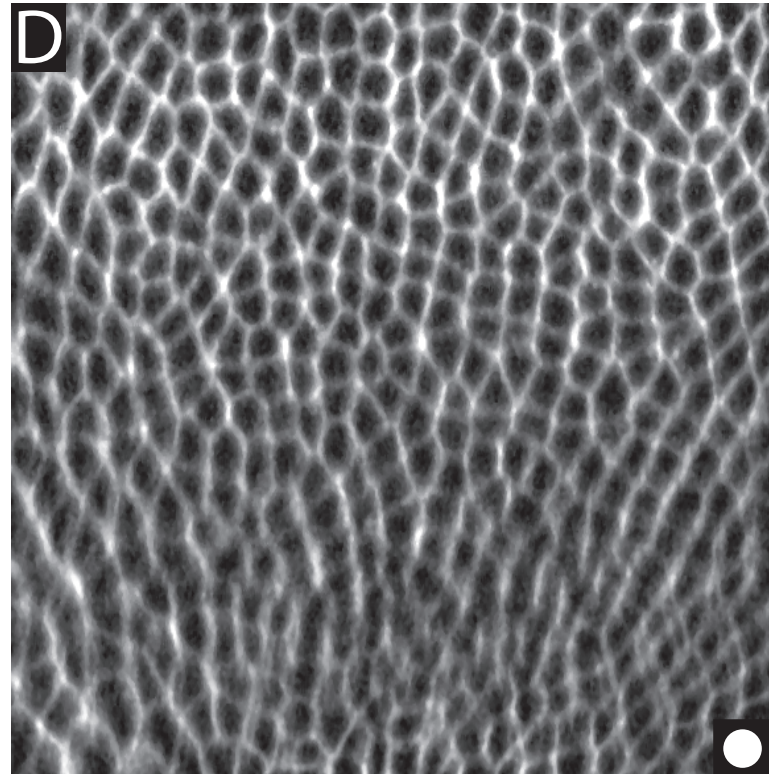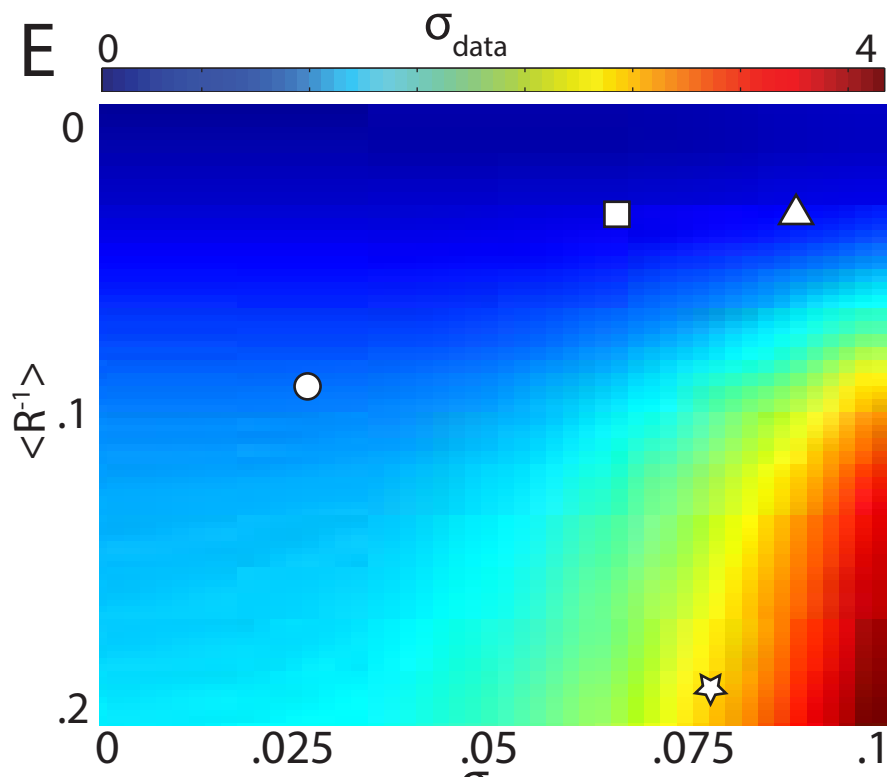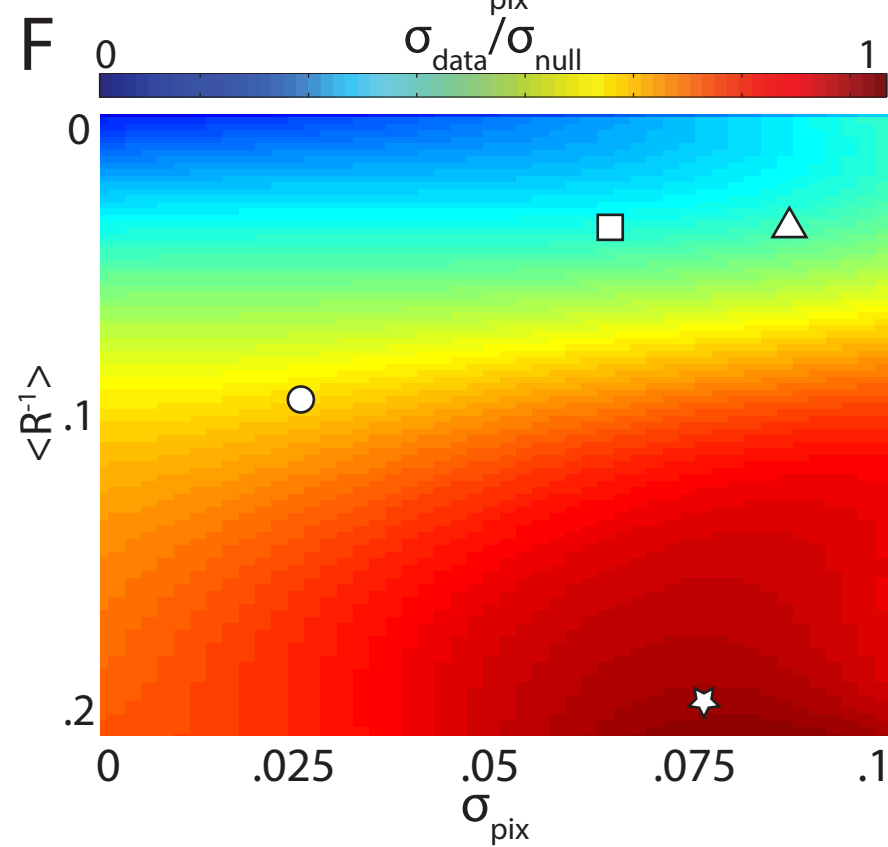

**G**

| Tissue           | $\sigma_{\text{data}}$ | $\sigma_{\text{data}}/\sigma_{\text{null}}$ | K.S. Pval |
|------------------|------------------------|---------------------------------------------|-----------|
| Ventral Furrow   | .42                    | .53                                         | 6.4e-10   |
| Pupal Notum      | .51                    | .57                                         | 3.6e-6    |
| Lateral Ectoderm | 1.23                   | .72                                         | 4.6e-5    |
| Larval Wing Disc | 2.1                    | .98                                         | 5.7e-4    |

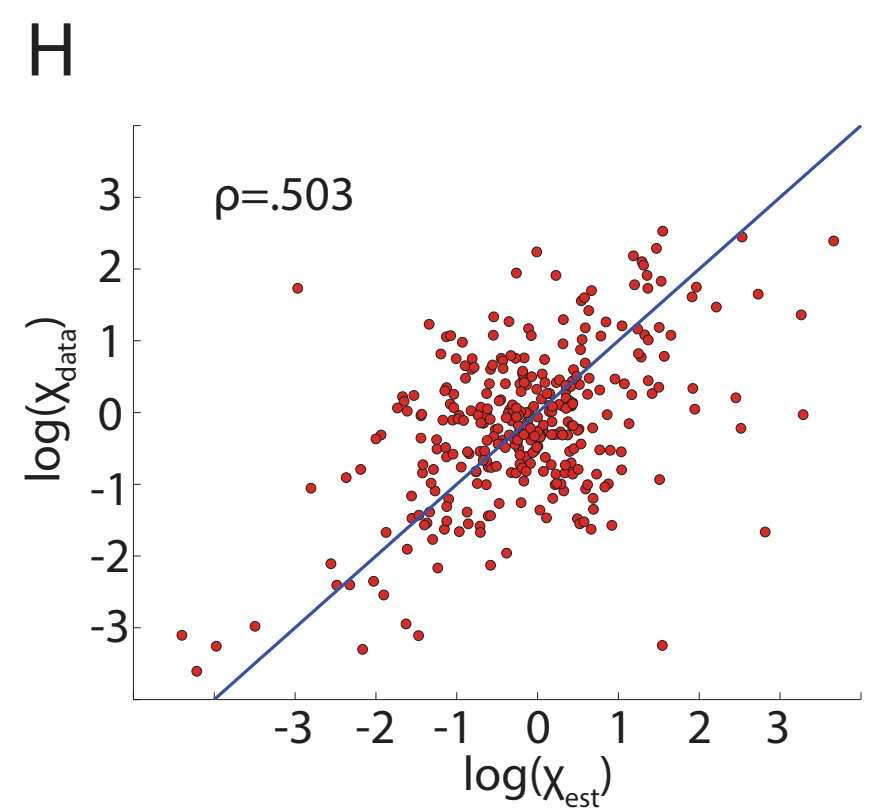

Supplement: NIHMS889270-supplement-7.pdf [file NIHMS889270-supplement-7.pdf]
