# Supplementary material
Source: PubMed Central journal article supplement (PMC6344062)

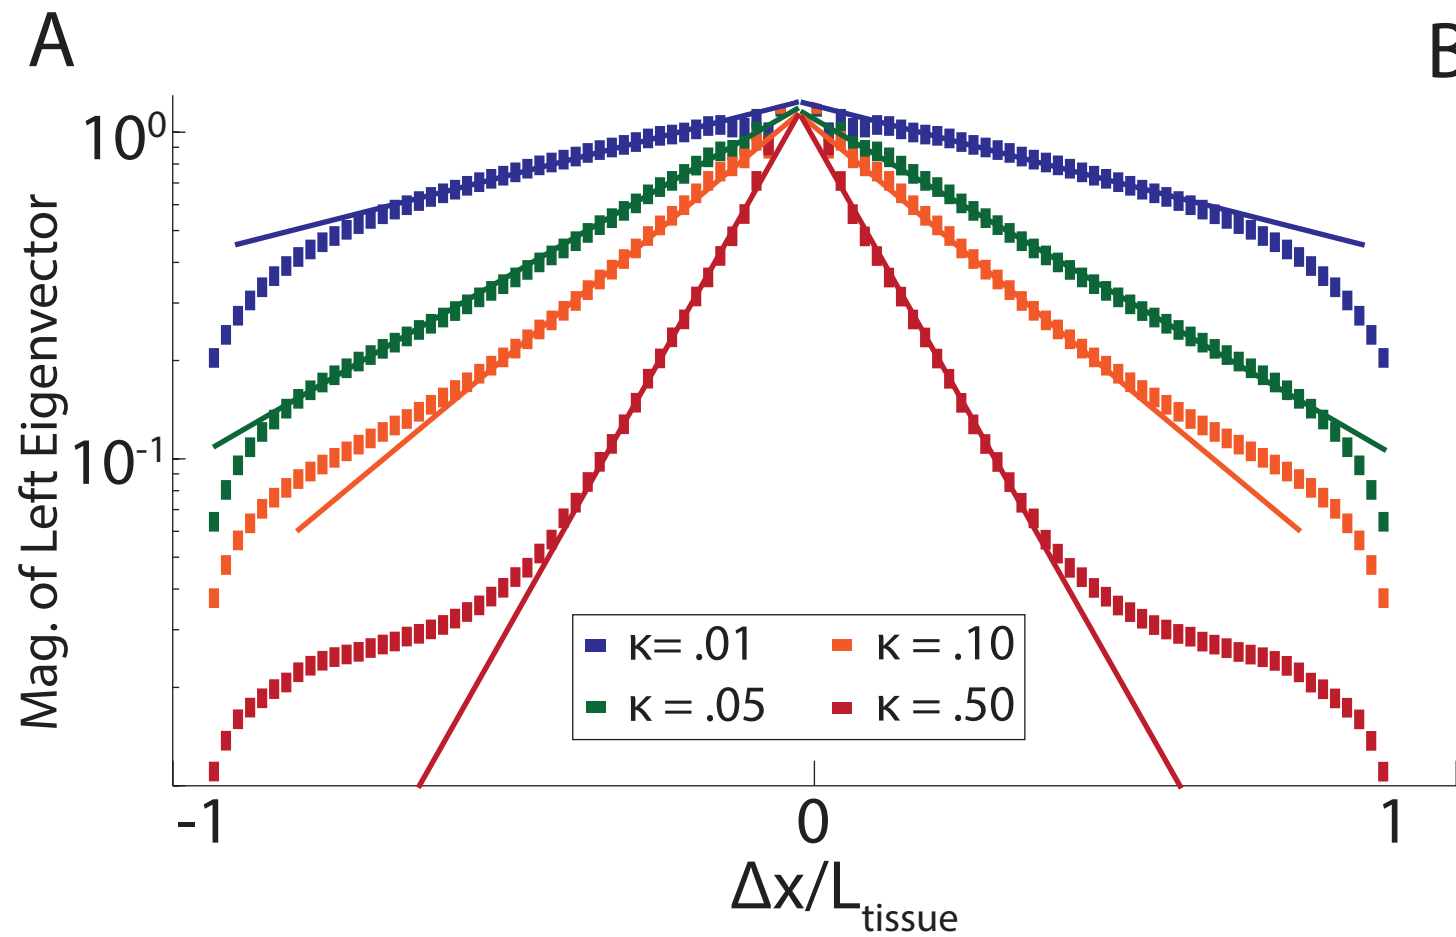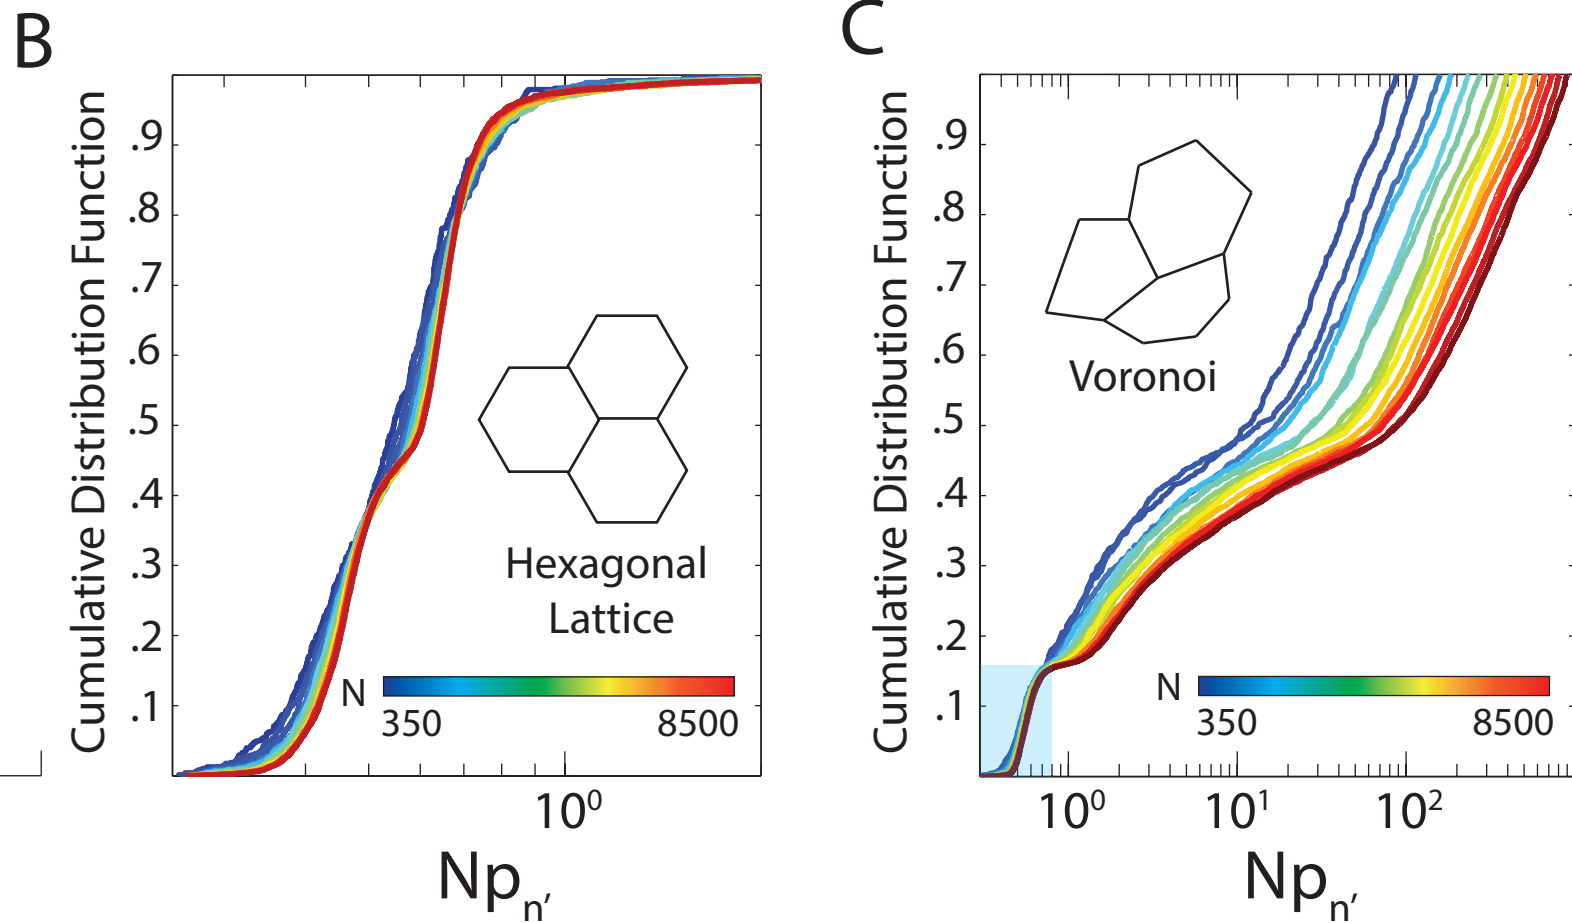

Supplement: NIHMS889270-supplement-5.pdf [file NIHMS889270-supplement-5.pdf]

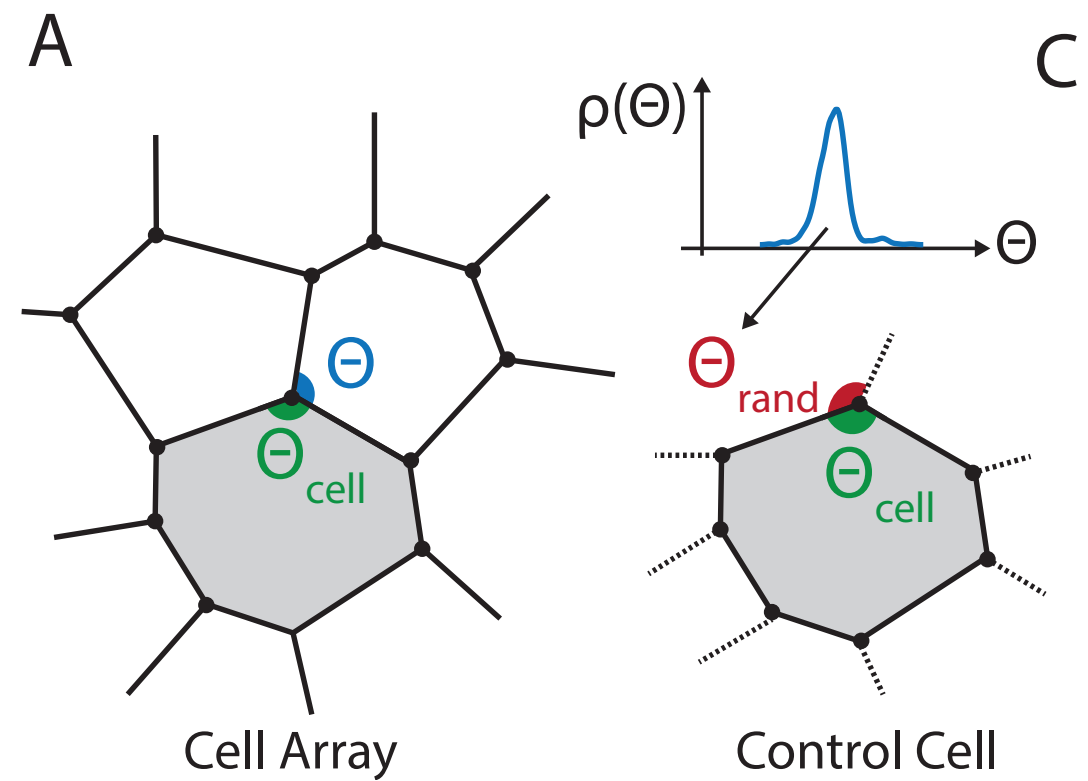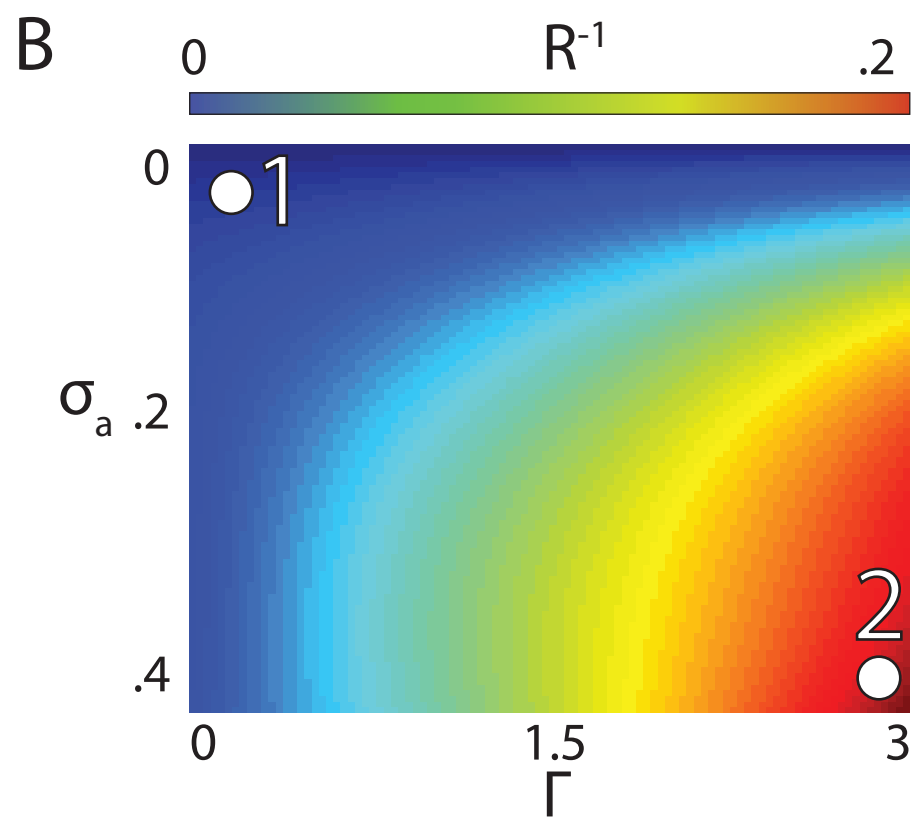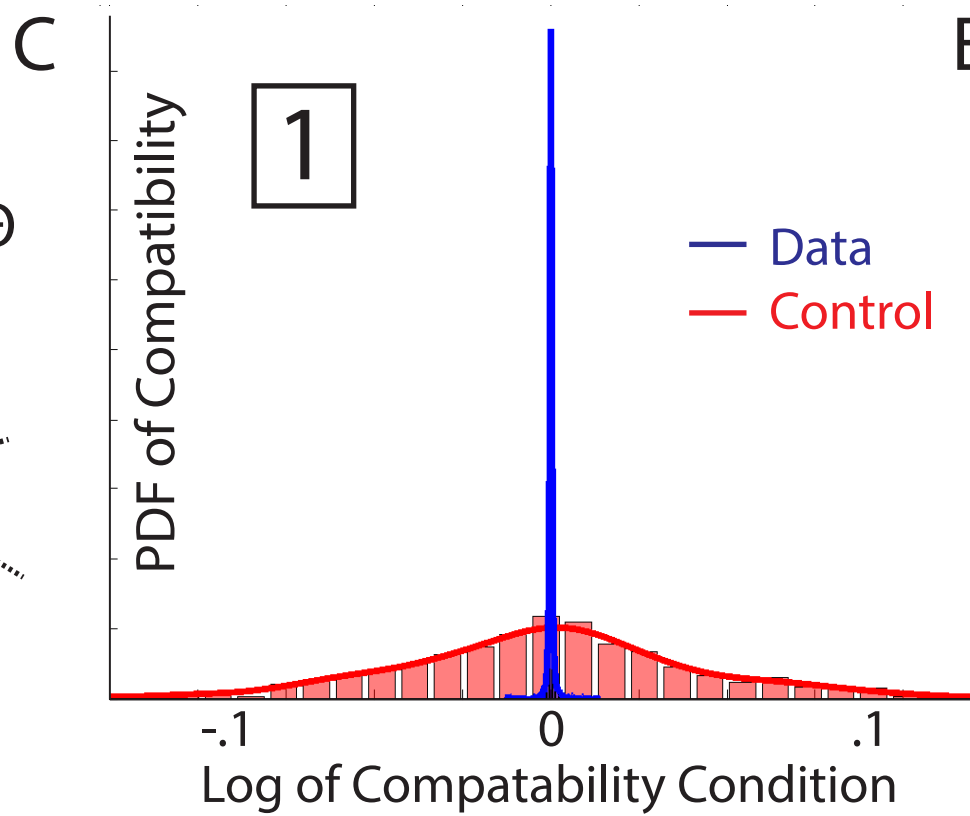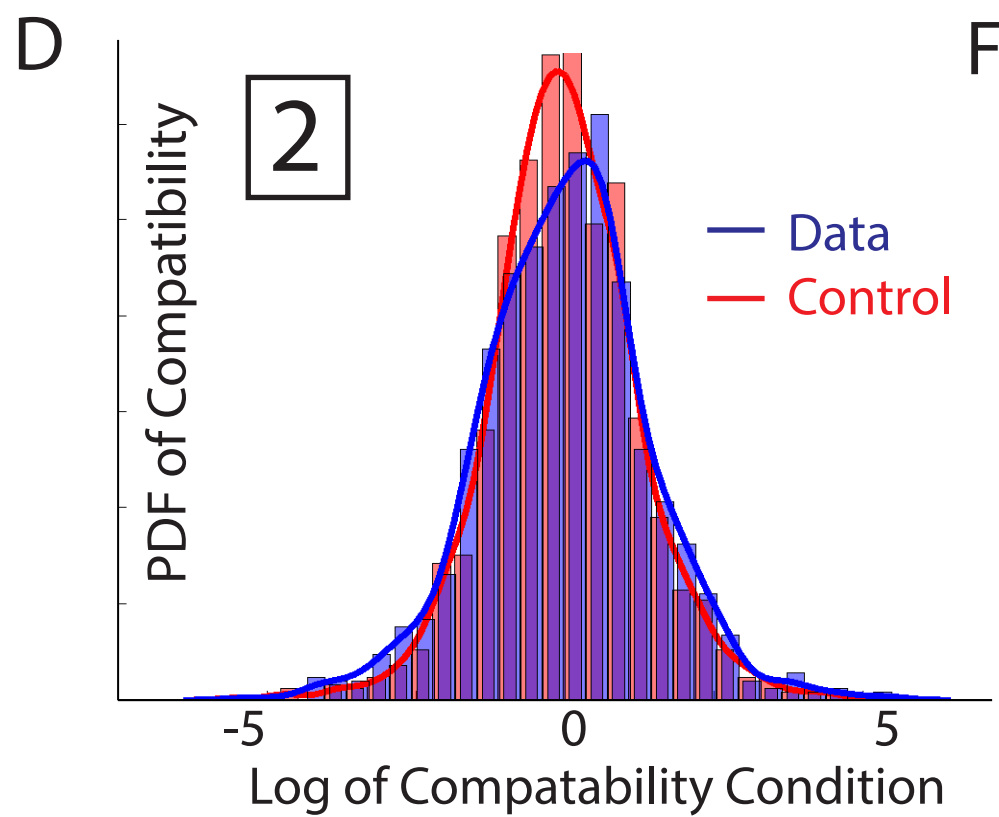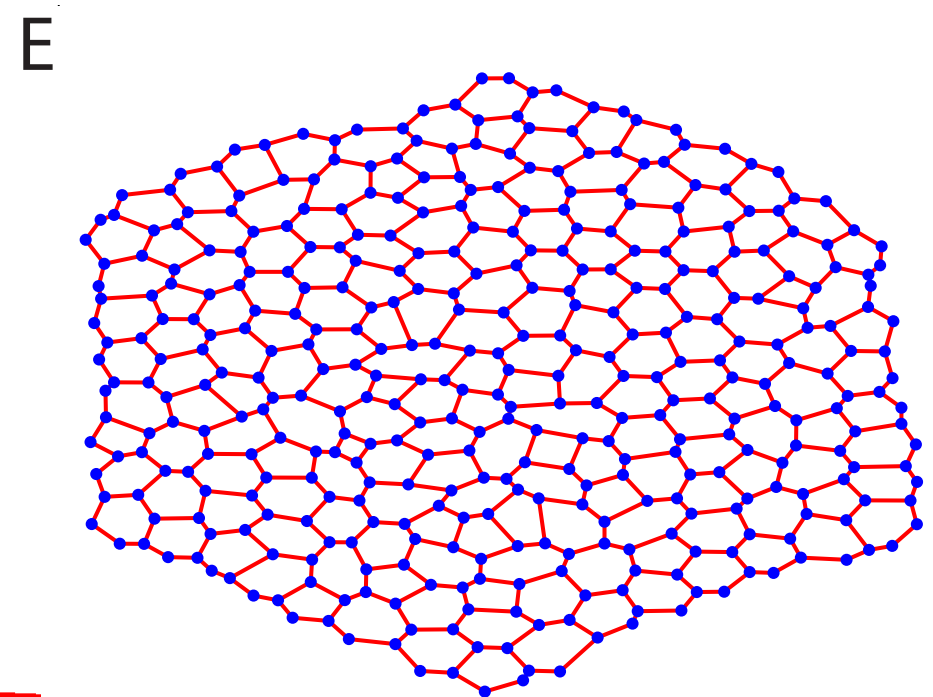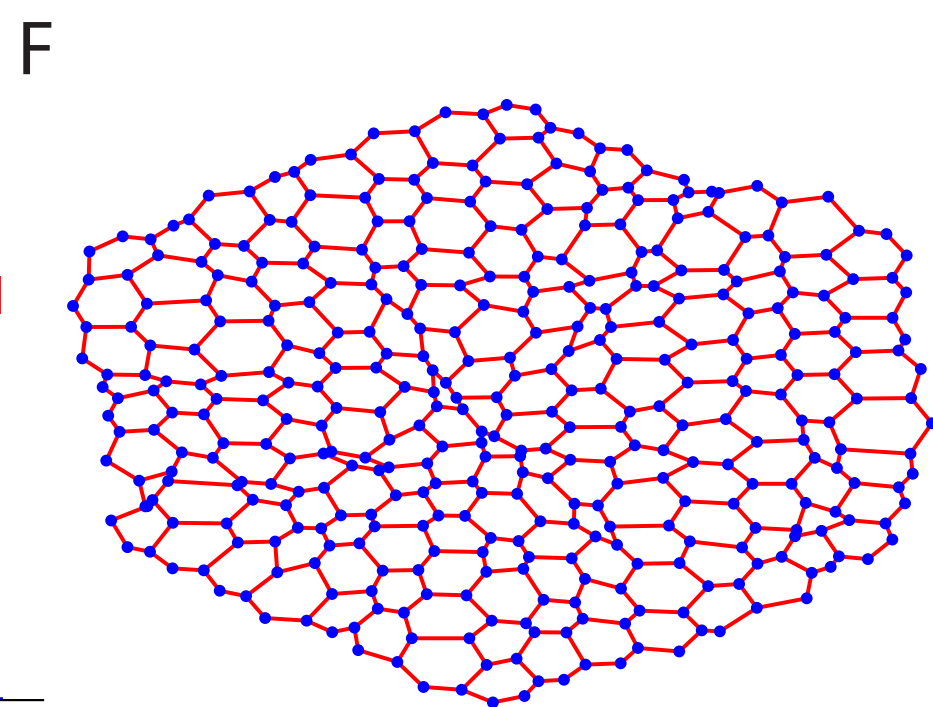

Supplement: NIHMS889270-supplement-6.pdf [file NIHMS889270-supplement-6.pdf]

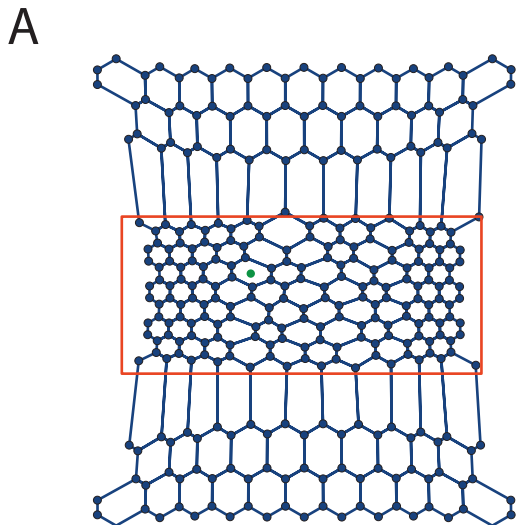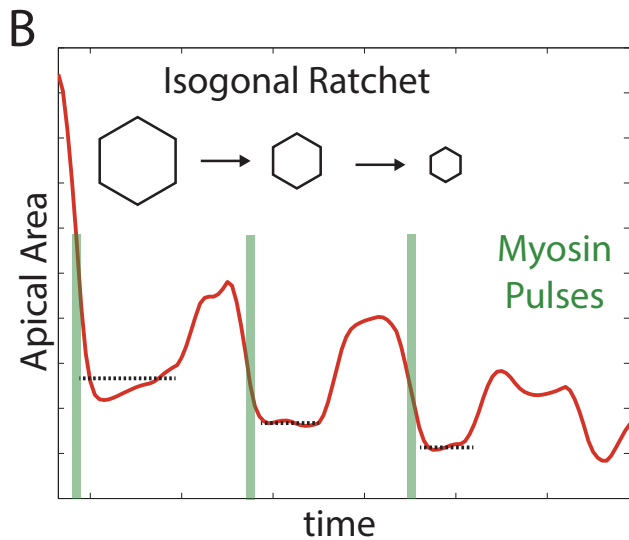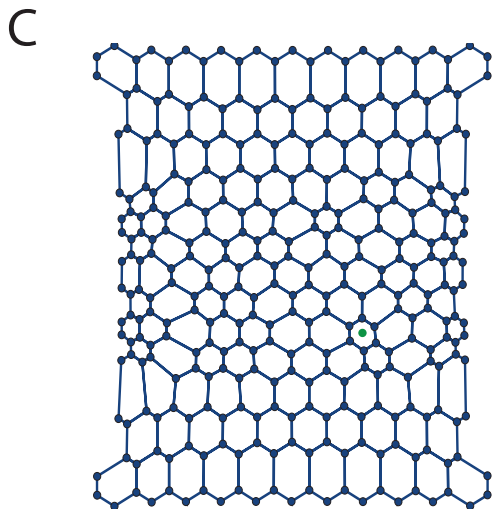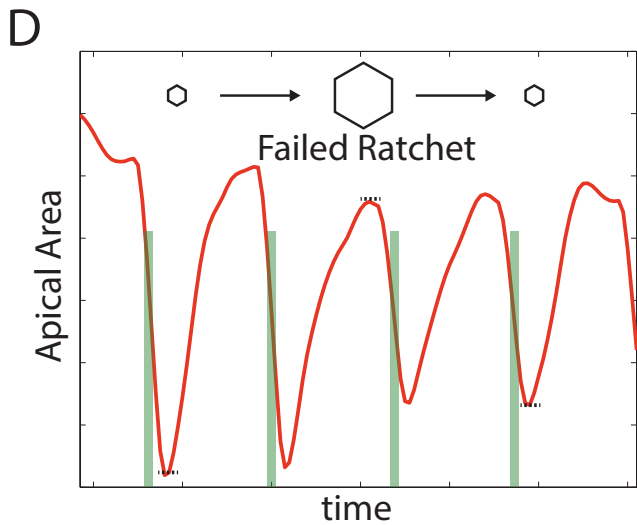

Supplement: NIHMS889270-supplement-9.pdf [file NIHMS889270-supplement-9.pdf]
